# Supplementary material for: Structural and biochemical analysis of human ADP-ribosyl-acceptor hydrolase 3 reveals the basis of metal selectivity and different roles for the two magnesium ions
Source: PubMed Central journal article supplement (PMC8141533; doi:10.1016/j.jbc.2021.100692), 2021-04-22
Supplement: mmc1.pdf [file mmc1.pdf]

# Supporting Information

Structural and biochemical analysis of human ADP-ribosyl-acceptor hydrolase 3 (ARH3) reveals the basis of metal selectivity and different roles for the two Mg ions

Yasin Pourfarjam<sup>1</sup>, Zhijun Ma<sup>1</sup>, Igor Kurinov<sup>2</sup>, Joel Moss<sup>3</sup>, and In-Kwon Kim<sup>1,\*</sup>

From the <sup>1</sup> Department of Chemistry, University of Cincinnati, 301 Clifton Ct, Cincinnati, OH 45221, USA; <sup>2</sup> Cornell University, Department of Chemistry and Chemical Biology, NE-CAT APS, Building 436E, 9700 S. Cass Ave., Argonne, IL 60439; <sup>3</sup> Pulmonary Branch, National Heart, Lung, and Blood Institute, National Institutes of Health, Bethesda, MD 20892

Running title: *Different roles of two metal ions in ARH3*

\* To whom correspondence should be addressed: In-Kwon Kim, Department of Chemistry, University of Cincinnati, 301 Clifton Ct, Cincinnati, OH 45221, USA; E-mail: [kimiw@ucmail.uc.edu](mailto:kimiw@ucmail.uc.edu); Tel.: (513) 556-1909; Fax.: (513) 556-9239.

## Supporting information contents:

**Figure S1.** Heat of ADPR injection into the buffer.

**Figure S2.** Ca<sup>2+</sup>-dependent inhibition of ARH3 activity.

**Figure S3.** A close-up view into the active site of the ARH3<sup>WT</sup>-ADPR-Mg<sup>2+</sup> complex.

**Table S1.** Calcium and Magnesium coordination parameters.

**Table S2.** Crystallographic data statistics.

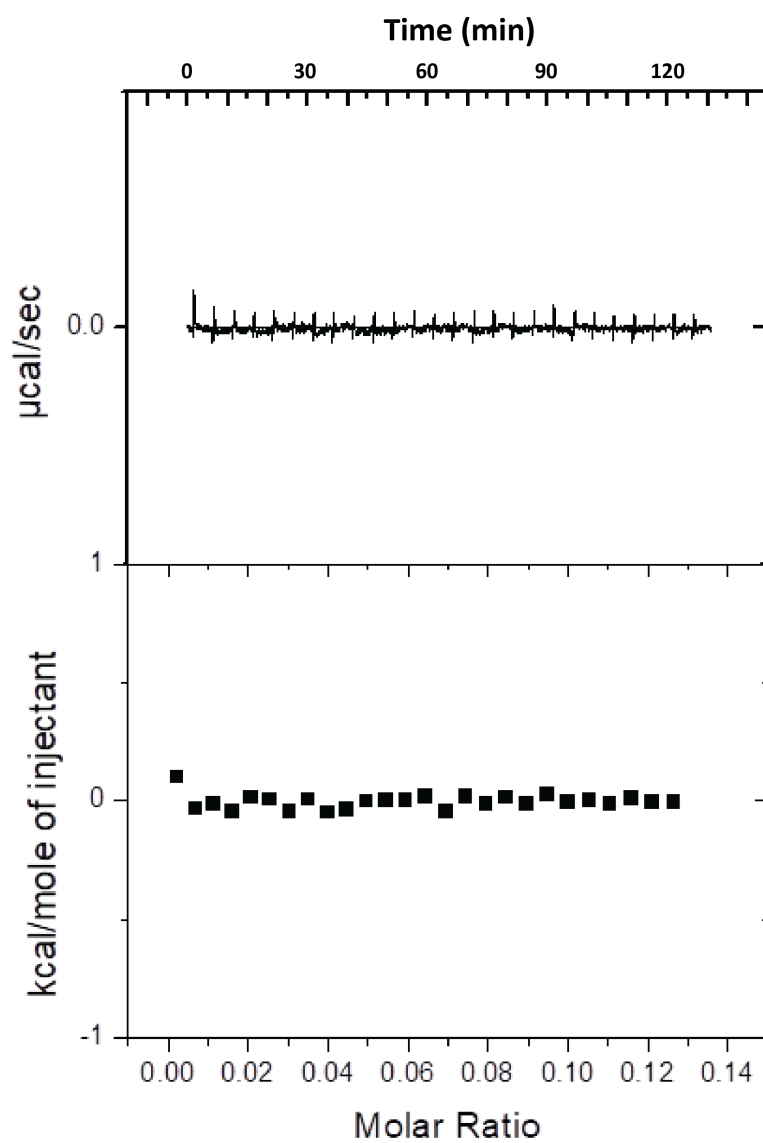

**Figure S1. Heat of ADPR injection into the buffer.** ADP-ribose ( $660 \mu\text{M}$ ) in syringe was injected into the cell containing a buffer ( $100 \text{ mM}$  Tris pH 7.5,  $150 \text{ mM}$  NaCl, and  $5 \text{ mM}$   $\text{MgCl}_2$ ).

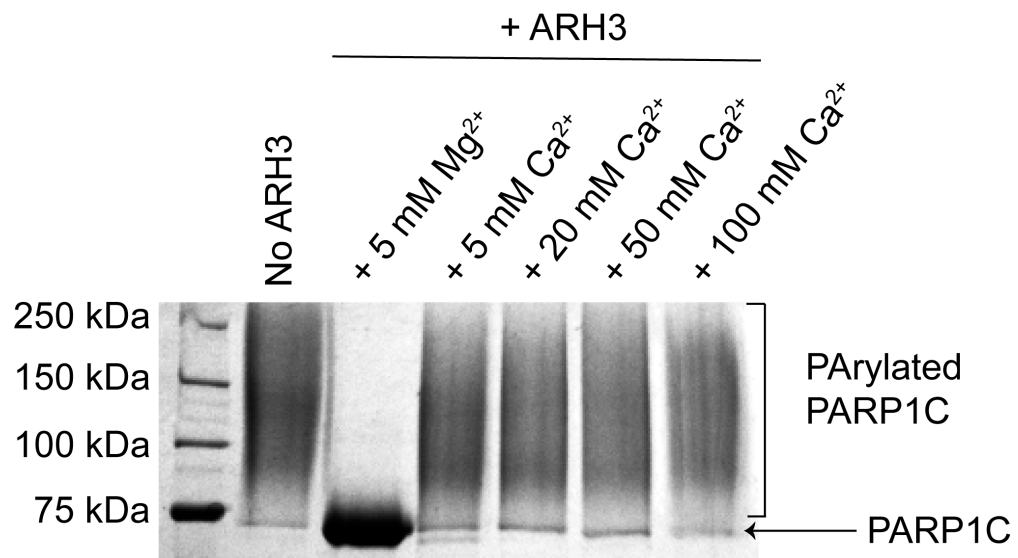

**Figure S2. Ca<sup>2+</sup>-dependent inhibition of ARH3 activity.** The PAR hydrolysis activity of ARH3 was monitored in the presence of Mg<sup>2+</sup> and increasing concentrations of Ca<sup>2+</sup>. 5 mM Ca<sup>2+</sup> was sufficient to effectively inhibit ARH3 activity and was used for ITC experiments.

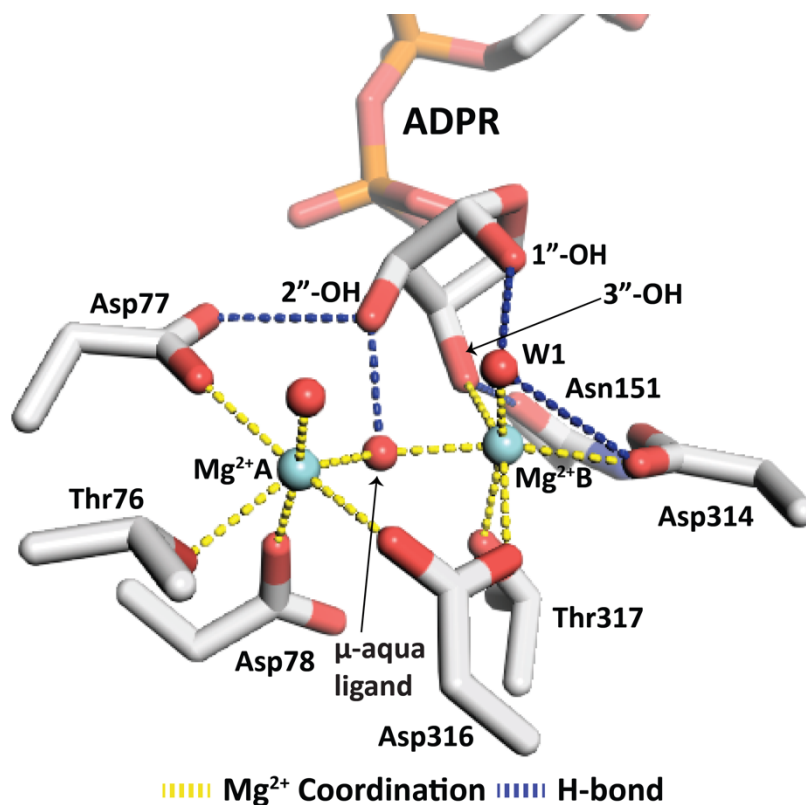

**Figure S3. A close-up view into the active site of ARH3<sup>WT</sup>-ADPR-Mg<sup>2+</sup> structure (1).** Mg<sup>A</sup> and Mg<sup>B</sup> are bridged by a water molecule ( $\mu$ -aqua ligand), which is expelled upon substitution of magnesium cations by calcium. In addition, in contrast to Ca<sup>2+</sup>-bound structure in which Ca<sup>B</sup> coordinates all three hydroxyl groups of the terminal ribose" (1''-OH, 2''-OH, 3''-OH), Mg<sup>B</sup> is in direct interaction with only the 3''-OH group.

| <b>ARH3-ADPR-Ca<sup>2+</sup></b>                   |      | <b>ARH3-ADPR-Mg<sup>2+</sup></b>                   |      |
|----------------------------------------------------|------|----------------------------------------------------|------|
| Ca <sup>2+</sup> diameter (Å)                      | 1.06 | Mg <sup>2+</sup> diameter (Å)                      | 0.72 |
| Ca <sup>A</sup> -Ligands number                    | 6    | Mg <sup>A</sup> -Ligands number                    | 6    |
| Ca <sup>B</sup> -Ligands number                    | 7    | Mg <sup>B</sup> -Ligands number                    | 6    |
| Ca <sup>A</sup> -Ligands distance (Å, Ave)         | 2.23 | Mg <sup>A</sup> -Ligands distance (Å, Ave)         | 2.49 |
| Ca <sup>B</sup> -Ligands distance (Å, Ave)         | 2.25 | Mg <sup>B</sup> -Ligands distance (Å, Ave)         | 2.82 |
| Ca <sup>A</sup> -Ca <sup>B</sup> distance (Å, Ave) | 3.3  | Mg <sup>A</sup> -Mg <sup>B</sup> distance (Å, Ave) | 3.1  |

**Table S1. Comparison of coordination parameters between ARH3-ADPR-Ca<sup>2+</sup> and ARH3-ADPR-Mg<sup>2+</sup> complexes.**

**Table S2. Crystallographic data statistics.** \*Values in parentheses are for highest-resolution shell. Each dataset was collected from a single crystal.

|                                                     | <i>h</i> ARH3 <sup>WT</sup> -ADPR-Ca <sup>2+</sup> | <i>h</i> ARH3 <sup>D77A</sup> -ADPR-Mg <sup>2+</sup> | <i>h</i> ARH3 <sup>D314A</sup> -ADPR-Mg <sup>2+</sup> |
|-----------------------------------------------------|----------------------------------------------------|------------------------------------------------------|-------------------------------------------------------|
| <b>Data collection</b>                              |                                                    |                                                      |                                                       |
| Space group                                         | P1                                                 | P1                                                   | P1                                                    |
| Cell dimensions                                     |                                                    |                                                      |                                                       |
| <i>a</i> , <i>b</i> , <i>c</i> (Å)                  | 44.9, 71.4, 115.6                                  | 44.7, 71.6, 115.9                                    | 44.8, 71.4, 115.8                                     |
| $\alpha$ , $\beta$ , $\gamma$ (°)                   | 93.9, 96.3, 107.1                                  | 94.2, 94.6, 107.6                                    | 94.0, 94.6, 107.8                                     |
| Wavelength (Å)                                      | 0.97                                               | 0.97                                                 | 0.97                                                  |
| Resolution (Å)                                      | 67.88 - 1.75                                       | 61.29 - 1.85                                         | 67.64 - 1.8                                           |
| <i>R</i> <sub>sym</sub> (%)                         | 2.8 (11.7)                                         | 7.8 (29.2)                                           | 12.1 (55.5)                                           |
| <i>I</i> / $\sigma$ <i>I</i>                        | 20.0 (6.6)                                         | 8.3 (2.7)                                            | 4.6 (1.2)                                             |
| Completeness (%)                                    | 91.5 (90.3)                                        | 89.5 (91.0)                                          | 89.8 (87.7)                                           |
| Redundancy                                          | 2.2 (2.2)                                          | 1.9 (1.9)                                            | 1.9 (1.8)                                             |
| <b>Refinement</b>                                   |                                                    |                                                      |                                                       |
| Resolution (Å)                                      | 67.88 - 1.75                                       | 61.29 - 1.85                                         | 67.64 - 1.80                                          |
| No. reflections                                     | 125,690                                            | 103,770                                              | 112,760                                               |
| <i>R</i> <sub>work</sub> / <i>R</i> <sub>free</sub> | 14.9/18.8                                          | 18.1/22.7                                            | 18.8/22.7                                             |
| No. atoms                                           |                                                    |                                                      |                                                       |
| Protein                                             | 10014                                              | 9845                                                 | 9986                                                  |
| Ligand/ion                                          | 152                                                | 148                                                  | 148                                                   |
| Water                                               | 1214                                               | 909                                                  | 857                                                   |
| <i>B</i> -factors                                   |                                                    |                                                      |                                                       |
| Protein                                             | 20.4                                               | 22.1                                                 | 22.3                                                  |
| Ligand/ion                                          | 21.6                                               | 20.2                                                 | 24.5                                                  |
| Water                                               | 60.6                                               | 30.1                                                 | 28.8                                                  |
| R.m.s deviations                                    |                                                    |                                                      |                                                       |
| Bond lengths (Å)                                    | 0.009                                              | 0.012                                                | 0.006                                                 |
| Bond angles (°)                                     | 0.97                                               | 1.14                                                 | 0.76                                                  |

## REFERENCES

1. Pourfarjam, Y., Ventura, J., Kurinov, I., Cho, A., Moss, J., and Kim, I. K. (2018) Structure of human ADP-ribosyl-acceptor hydrolase 3 bound to ADP-ribose reveals a conformational switch that enables specific substrate recognition. *J Biol Chem* **293**, 12350-12359
